# Supplementary material for: Bisphenol A Exposure Enhances Atherosclerosis in WHHL Rabbits
Source: PubMed Central journal article supplement (PMC4205098; doi:10.1371/journal.pone.0110977), 2014-10-21
Supplement: pone.0110977.s001.pdf [file pone.0110977.s001.pdf]

**Table S1. Primer sequences for quantitative real-time PCR in vivo and in vitro studies.**

| Gene name      | 5'-Primer                  | 3'-Primer                |
|----------------|----------------------------|--------------------------|
| <b>Rabbit</b>  |                            |                          |
| Bip            | ACCTGGTGCTGGATGTATGTC      | GAGCAGGGGGAATCCAGTCAGA   |
| CALR           | CGGCGATCAGGAGAAAGATAAA     | GCTGTCGTAGGCATAGATGTTAG  |
| Chop           | GATGAAAATGGGGGTACCTATGTCTC | GCTGCGCACTGGCCACTCTGTT   |
| GAPDH          | ATCACTGCCACCCAGAAGAC       | GTGAGTTTCCCGTTCAGCTC     |
| IL-1 $\beta$   | GGAGAGCTCTTTCCCACCAG       | TGGGTACCAAGGTTCTTTGAA    |
| IL-6           | AGACGACCACGATCCACTTC       | CAGGATGGTGTGTTCTGACC     |
| LXR- $\alpha$  | CAGATCCGCCTGAAGAACT        | CTCCCGGTTGTAGCTGAAAT     |
| MTTP           | GTCTTCCAGAGCGAGTGTAAG      | GGCAAATCCACAGGCATAAAG    |
| PAI-1          | ACGGTCAAGCAGGTGGACT        | GAGGGCATTACCAGCAG        |
| PPAR- $\alpha$ | TACGAGGCCTACCTGAAGAA       | CGACGACAGCATCGTGAATA     |
| <b>Human</b>   |                            |                          |
| Bip[1]         | CGGGCAAAGATGTCAGGAAAG      | TTCTGGACGGGCTTCATAGTAGAC |
| GAPDH          | GGAGAAGGCTGGGGCTCAT        | TGATGGCATGGACTGTGGTC     |
| MCP-1          | GTGGTCCATGGAATCCTGAA       | CAGCCAGATGCAATCAATGC     |
| NF-kB          | TGGGAATGGTGAGGTCCTCT       | TCCTGAACTCCAGCACTCTCTTC  |
| TNF- $\alpha$  | TGTGTGGCTGCAGGAAGAAC       | GCAATTGAAGCACTGGAAAAGG   |
| VCAM-1[2]      | ACAGAAGAAGTGGCCCTCCAT      | TGGCATCCGTCAGGAAGTG      |
| VEGF-A         | CCTGGAGCGTATGTGACAAGCC     | TCCTGGTGAGAGATCTGGTTCCC  |

*Bip*, binding immunoglobulin protein; *CALR*, calreticulin; *Chop*, C/EBP homologous protein; *GAPDH*, glyceraldehyde 3-phosphate dehydrogenase; *IL-6*, interleukin-6; *LXR- $\alpha$* , liver X receptor alpha; *MCP-1*, monocyte chemotactic protein 1; *MTTP*, microsomal triglyceride transfer protein; *NF-kB*, nuclear factor-kappa B; *PAI-1*, plasminogen activator inhibitor-1; *PPAR- $\alpha$* , proliferator-activated receptor alpha; *TNF- $\alpha$* , tumor necrosis factor alpha; *VCAM-1*, vascular cell adhesion molecule-1; *VEGF-A*, vascular endothelial growth factor A

**References:**

1. Jian Z, Li J-B, Ma R-Y, Chen L, Wang X-F, et al. (2012) Pivotal role of activating transcription factor 6 $\alpha$  in myocardial adaptation to chronic hypoxia. *Int J Biochem Cell Biol* 44: 972-979.
2. Angel-Morales G, Noratto G, Mertens-Talcott S (2012) Red wine polyphenolics reduce the expression of inflammation markers in human colon-derived CCD-18Co myofibroblast cells: Potential role of microRNA-126. *Food Funct* 3: 745-752.
